# Supplementary material for: Association of Mandated Language Access Programming and Quality of Care Provided by Mental Health Agencies
Source: Atypon-hosted journal article supplement (doi:10.1176/appi.ps.201300522), 2014-12-17
Supplement: appi.ps.201300522.ds001.pdf [file appi.ps.201300522.ds001.pdf]

**APPENDIX:****Table A1:** Sensitivity test: Rates of new clients receiving two, three or four medication follow-up visits within 30, 60 or 90 days and a preceding “clean period” of 90 days

|                | Two medication<br>follow-up visits | Three medication<br>follow-up visits | Four medication<br>follow-up visits |
|----------------|------------------------------------|--------------------------------------|-------------------------------------|
| <b>30 days</b> |                                    |                                      |                                     |
| English        | 9.50                               | 3.99                                 | 1.97                                |
| Spanish        | 9.76                               | 3.60                                 | 1.54                                |
| <b>60 days</b> |                                    |                                      |                                     |
| English        | 20.58                              | 10.20                                | 5.73                                |
| Spanish        | 23.44*                             | 10.55                                | 5.66                                |
| <b>90 days</b> |                                    |                                      |                                     |
| English        | 29.58                              | 17.10                                | 10.37                               |
| Spanish        | 34.46*                             | 19.23*                               | 11.35                               |

Note: N=911. \*Indicates that the mean rate of persons meeting adequate follow-up visits differed by primary language at statistically significant levels ( $p < 0.05$ ).

**Table A2:** Sensitivity test: Rates of new clients receiving two, three or four medication follow-up visits within 60, 90, or 180 days and a preceding “clean period” of 180 days

|                 | Two medication<br>follow-up visits | Three medication<br>follow-up visits | Four medication<br>follow-up visits |
|-----------------|------------------------------------|--------------------------------------|-------------------------------------|
| <b>60 days</b>  |                                    |                                      |                                     |
| English         | 22.94                              | 12.08                                | 7.13                                |
| Spanish         | 25.26                              | 12.81                                | 6.36                                |
| <b>90 days</b>  |                                    |                                      |                                     |
| English         | 31.13                              | 19.24                                | 12.13                               |
| Spanish         | 34.97*                             | 21.90*                               | 13.29                               |
| <b>180 days</b> |                                    |                                      |                                     |
| English         | 44.01                              | 33.71                                | 25.96                               |
| Spanish         | 50.02*                             | 39.93*                               | 31.40*                              |

Note: N=718. \* Indicates that the mean rate of persons meeting adequate follow-up visits differed by primary language at statistically significant levels ( $p < 0.05$ ).

**Table A3:** Sensitivity test: Association between time and language programming with rates of new clients receiving two, three or four medication follow-up visits within 30, 60 or 90 days and a preceding “clean period” of 90 days

| Regression variable   | Two medication follow-up visits | Three medication follow-up visits | Four medication follow-up visits |
|-----------------------|---------------------------------|-----------------------------------|----------------------------------|
| <b>30 days</b>        |                                 |                                   |                                  |
| Quarter               | -0.209 [-0.604,0.186]           | -0.175 [-0.302,-0.049]**          | -0.067 [-0.142,0.009]            |
| Language programming  | 2.181 [-6.743,11.106]           | -1.133 [-5.986,3.720]             | 0.253 [-3.200,3.706]             |
| Quarter * programming | -0.123 [-0.544,0.299]           | 0.030 [-0.166,0.226]              | -0.014 [-0.135,0.106]            |
| <b>60 days</b>        |                                 |                                   |                                  |
| Quarter               | -0.104 [-0.508,0.301]           | -0.164 [-0.409,0.081]             | -0.168 [-0.299,-0.036]*          |
| Language programming  | 4.073 [-4.617,12.763]           | 1.618 [-5.930,9.165]              | 4.342 [-1.613,10.297]            |
| Quarter * programming | -0.398 [-0.810,0.014]           | -0.182 [-0.499,0.134]             | -0.204 [-0.427,0.018]            |
| <b>90 days</b>        |                                 |                                   |                                  |
| Quarter               | <b>-0.282 [-0.916,0.352]</b>    | -0.218 [-0.513,0.077]             | -0.205 [-0.388,-0.023]*          |
| Language programming  | <b>3.163 [-8.098,14.424]</b>    | 1.419 [-8.340,11.178]             | 2.400 [-5.856,10.656]            |
| Quarter * programming | <b>-0.288 [-0.926,0.351]</b>    | -0.193 [-0.550,0.163]             | -0.197 [-0.508,0.113]            |

**Note:** This table shows partial results from nine regression models, each having a dependent variable constructed slightly differently, by follow-up time and number of required visits. All control variables were included in each model. The dependent variable ultimately selected for the final analysis is indicated in bold. N=911. \*Indicates \*P < 0.05; \*\*P < 0.01.

**Table A4:** Sensitivity test: Association between time and language programming with rates of new clients receiving two, three or four medication follow-up visits within 60, 90, or 180 days and a preceding “clean period” of 180 days

| Regression variable   | Two medication follow-up visits | Three medication follow-up visits | Four medication follow-up visits |
|-----------------------|---------------------------------|-----------------------------------|----------------------------------|
| <b>60 days</b>        |                                 |                                   |                                  |
| Quarter               | -0.608 [-1.225,0.009]           | -0.450 [-0.922,0.022]             | -0.300 [-0.605,0.005]            |
| Language programming  | -1.939 [-16.239,12.361]         | -7.389 [-22.984,8.207]            | -1.185 [-10.938,8.569]           |
| Quarter * programming | 0.022 [-0.629,0.672]            | 0.153 [-0.374,0.681]              | 0.066 [-0.274,0.406]             |
| <b>90 days</b>        |                                 |                                   |                                  |
| Quarter               | -0.696 [-1.321,-0.072]*         | -0.777 [-1.420,-0.133]*           | -0.531 [-0.973,-0.089]*          |
| Language programming  | -0.112 [-14.600,14.376]         | -7.984 [-26.222,10.255]           | -8.040 [-21.942,5.861]           |
| Quarter * programming | 0.078 [-0.612,0.768]            | 0.318 [-0.381,1.017]              | 0.221 [-0.266,0.709]             |
| <b>180 days</b>       |                                 |                                   |                                  |
| Quarter               | -0.393 [-1.000,0.213]           | -0.672 [-1.294,-0.051]*           | -0.646 [-1.196,-0.096]*          |
| Language programming  | 8.949 [-4.421,22.319]           | 2.931 [-12.068,17.929]            | -1.537 [-17.602,14.528]          |
| Quarter * programming | -0.230 [-0.893,0.432]           | -0.032 [-0.715,0.652]             | 0.023 [-0.644,0.690]             |

**Note:** This table shows partial results from nine regression models, each having a dependent variable constructed slightly differently, by follow-up time and number of required visits. All control variables were included in each model. N=718. \*Indicates \*P < 0.05; \*\*P < 0.01.
